# Supplementary material for: The evolution of reproductive modes and life cycles in amphibians
Source: PubMed Central journal article supplement (PMC9672123; doi:10.1038/s41467-022-34474-4), 2022-11-17
Supplement: 41467_2022_34474_MOESM1_ESM.pdf [file 41467_2022_34474_MOESM1_ESM.pdf]

## Supplementary Information

---

### Supplementary Tables

**Supplementary Table 1:** Results for corHMM trait evolution model fitting (Anura).

**Supplementary Table 2:** Results for corHMM trait evolution model fitting (Caudata).

**Supplementary Table 3:** Results for corHMM trait evolution model fitting (Gymnophiona).

**Supplementary Table 4:** Results for corHMM trait evolution model fitting (Anura with 4-state coding).

**Supplementary Table 5:** Results for corHMM trait evolution model fitting (without species with no or inferred reproductive modes).

**Supplementary Table 6:** Results for secse diversification rate model fitting, where extinction is fixed to be 0.

**Supplementary Table 7:** Comparison of reproductive mode coding to that of Duellman and Trueb 1994.

**Supplementary Table 8:** Effect of root prior on corHMM models. Performance measured using Akaike Information Criterion (AIC), when implementing different transition rate restrictions (ER= equal rates; SYM=symmetric rates; ARD=all rates different) and root priors (MaddFitz and Yang), with or without hidden states (HMM=Hidden Markov Model).

**Supplementary Table 9:** Log Marginal Likelihood (log ML) estimates using the standard versus covarion BayesTraits Multistate algorithms with reverse jump MCMC and a stepping stone sampler, for Anura, Caudata and Gymnophiona.

**Supplementary Table 10:** Posterior transition rate metrics for Anura, estimated using the covarion BayesTraits Multistate algorithms with reverse jump MCMC. Tabulated are the mean and median transition rates for each transition (where states are Aquatic [A], Semi-terrestrial [S], Terrestrial [T], Direct development [D] and Live-bearing [L]) as well as the percentage any given transition was not fixed to be zero in the posterior (i.e. how frequently is a given transition represented in the posterior) and the Effective Sample Size (ESS) + Highest probability Density interval (HPD) for the mean rate. Transitions are ranked by how frequently they were not zero.

**Supplementary Table 11:** Posterior transition rate metrics for Caudata, estimated using the covarion BayesTraits Multistate algorithms with reverse jump MCMC. Tabulated are the mean and

median transition rates for each transition (where states are Aquatic [A], Semi-terrestrial [S], Direct development [D], Live-bearing [L], and Paedomorphism[P]), as well as the percentage any given transition was not fixed to be zero in the posterior (i.e. how frequently is a given transition represented in the posterior) and the Effective Sample Size (ESS) + Highest probability Density interval (HPD) for the mean rate. Transitions are ranked by how frequently they were not zero.

**Supplementary Table 12:** Posterior transition rate metrics for Gymnophiona, estimated using the covarion BayesTraits Multistate algorithms with reverse jump MCMC. Tabulated are the mean and median transition rates for each transition (where states are Semi-terrestrial [S], Direct development [D] and Live-bearing [L]) as well as the percentage any given transition was not fixed to be zero in the posterior (i.e. how frequently is a given transition represented in the posterior) and the Effective Sample Size (ESS) + Highest probability Density interval (HPD) for the mean rate. Transitions are ranked by how frequently they were not zero.

### **Supplementary Figures**

**Supplementary Figure 1:** Ancestral state estimates of reproductive modes for Anura based on best-fitting corHMM model parameters and the joint estimation method. States are mapped onto the phylogeny with nodes and associated upstream branches coloured based on the estimated node state. Blue = aquatic; dark green = semi-terrestrial; brown = terrestrial; light green = direct development; red = live-bearing.

**Supplementary Figure 2:** Ancestral state estimates of reproductive modes for Caudata based on best-fitting corHMM model parameters and the joint estimation method. States are mapped onto the phylogeny with nodes and associated upstream branches coloured based on the estimated node state. Blue = aquatic; dark green = semi-terrestrial; light green = direct development; red = live-bearing; yellow = paedomorphism.

**Supplementary Figure 3:** Ancestral state estimates of reproductive modes for Gymnophiona, based on best-fitting corHMM model parameters and the joint estimation method. States are mapped onto the phylogeny with nodes and associated upstream branches coloured based on the estimated node state. Dark green = semi-terrestrial; light green = direct development; red = live-bearing.

**Supplementary Figure 4:** Ancestral state estimates of reproductive modes for Anura based on best-fitting corHMM model parameters and the stochastic character mapping method. States are mapped onto the phylogeny with nodes depicting pie charts of posterior probabilities of node states from 1000 simulations. Upstream branches are coloured based on the largest proportion of the estimated node state. Blue = aquatic; dark green = semi-terrestrial; brown = terrestrial; light green = direct development; red = live-bearing.

**Supplementary Figure 5:** Ancestral state estimates of reproductive modes for Caudata based on best-fitting corHMM model parameters and the stochastic character mapping method. States are mapped onto the phylogeny with nodes depicting pie charts of posterior probabilities of node states from 1000 simulations. Upstream branches are coloured based on the largest proportion of the estimated node state. Blue = aquatic; dark green = semi-terrestrial; light green = direct development; red = live-bearing; yellow = paedomorphism.

**Supplementary Figure 6:** Ancestral state estimates of reproductive modes for Gymnophiona based on best-fitting corHMM model parameters and the stochastic character mapping method. States are mapped onto the phylogeny with nodes depicting pie charts of posterior probabilities of node states from 1000 simulations. Upstream branches are coloured based on the largest proportion of the estimated node state. Dark green = semi-terrestrial; light green = direct development; red = live-bearing.

**Supplementary Figure 7:** Marginal probabilities of reproductive mode of the most recent common ancestor of all amphibians and for Anura, Caudata and Gymnophiona. Probabilities were estimated using transition rates estimated from different models (er= equal rates; sym=symmetric rates; ard=all rates different), without and with hidden states (HMM=hidden Markov model) and two different root prior methods, MaddFitz and Yang, using corHMM. Blue = aquatic; dark green = semi-terrestrial; brown = terrestrial; light green = direct development; red = live-bearing, yellow = paedomorphism.

**Supplementary Figure 8:** Representation (% of the posterior) of the 25 most frequent models sampled by the covarion BayesTraits Multistate algorithms with reverse jump MCMC for Anura, Caudata and Gymnophiona.

**Supplementary Figure 9:** Pie charts showing the mean posterior probabilities of root states per amphibian group (Anura, Caudata and Gymnophiona) as estimated using the covarion BayesTraits Multistate algorithms with reverse jump MCMC. Blue = aquatic; dark green = semi-terrestrial; brown = terrestrial; light green = direct development; red = live-bearing, yellow = paedomorphism.

### **Supplementary Notes**

**Supplementary Note 1:** Root state estimations for the Amphibia, using corHMM

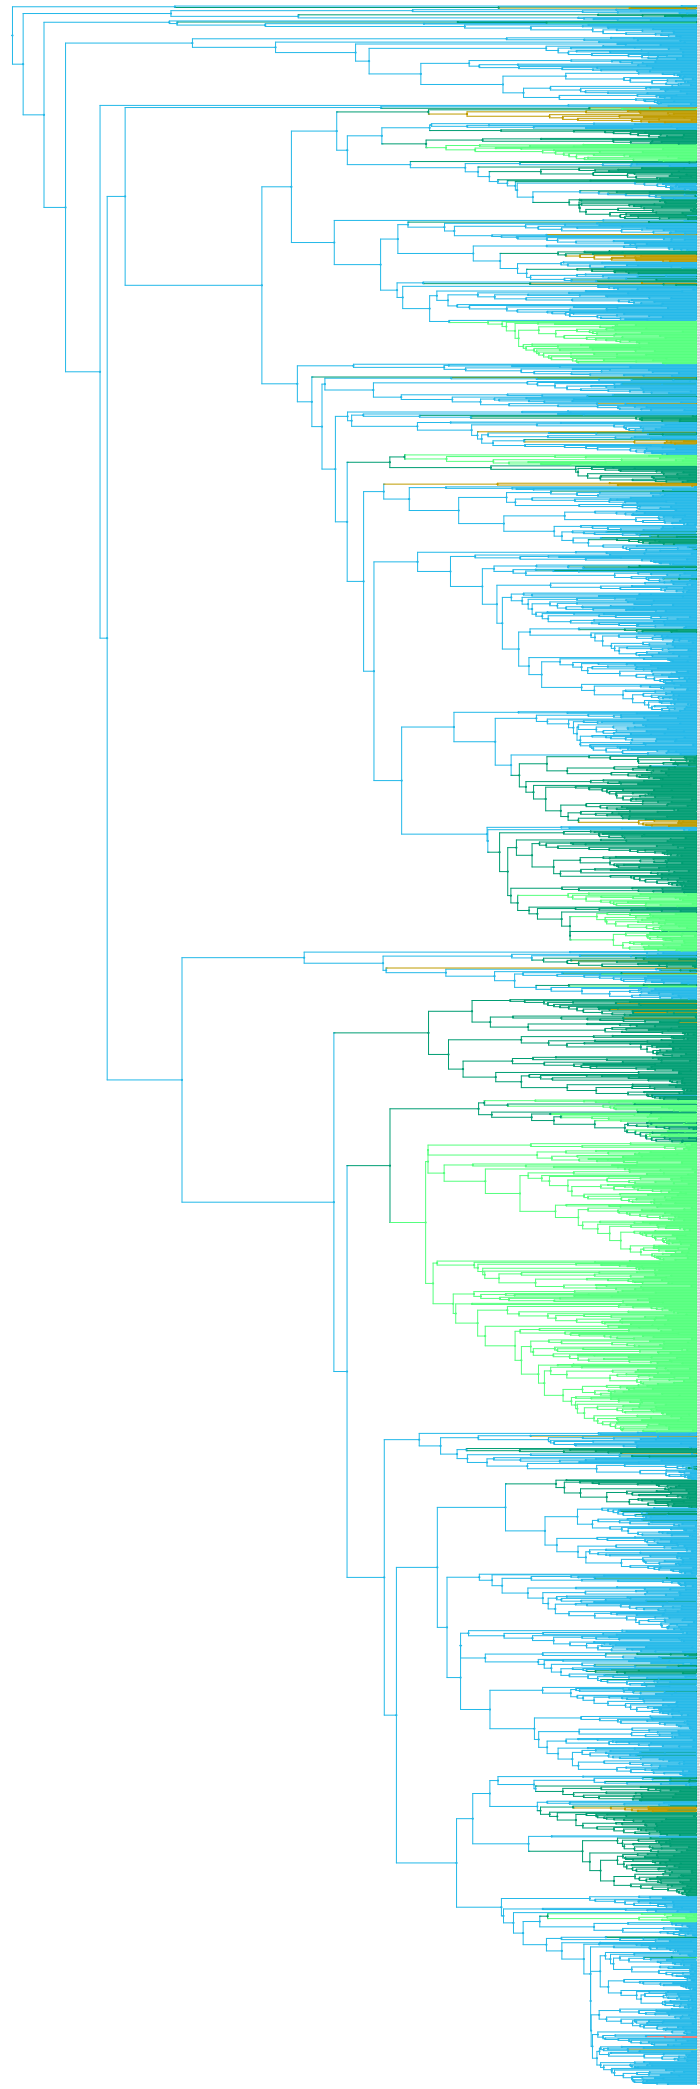

**Anura**  
 Life-history modes  
 • Aquatic  
 • Semi-aquatic  
 • Live-bearing  
 • Direct development  
 • Terrestrial

Supplementary Figure 1. Ancestral state estimates of reproductive modes for Anura based on best-fitting corHMM model parameters and the joint estimation method. States are mapped onto the phylogeny with nodes and associated upstream branches coloured based on the estimated mode state. Blue = aquatic; dark green = semi-aquatic; brown = terrestrial; light green = direct development; red = live-bearing.

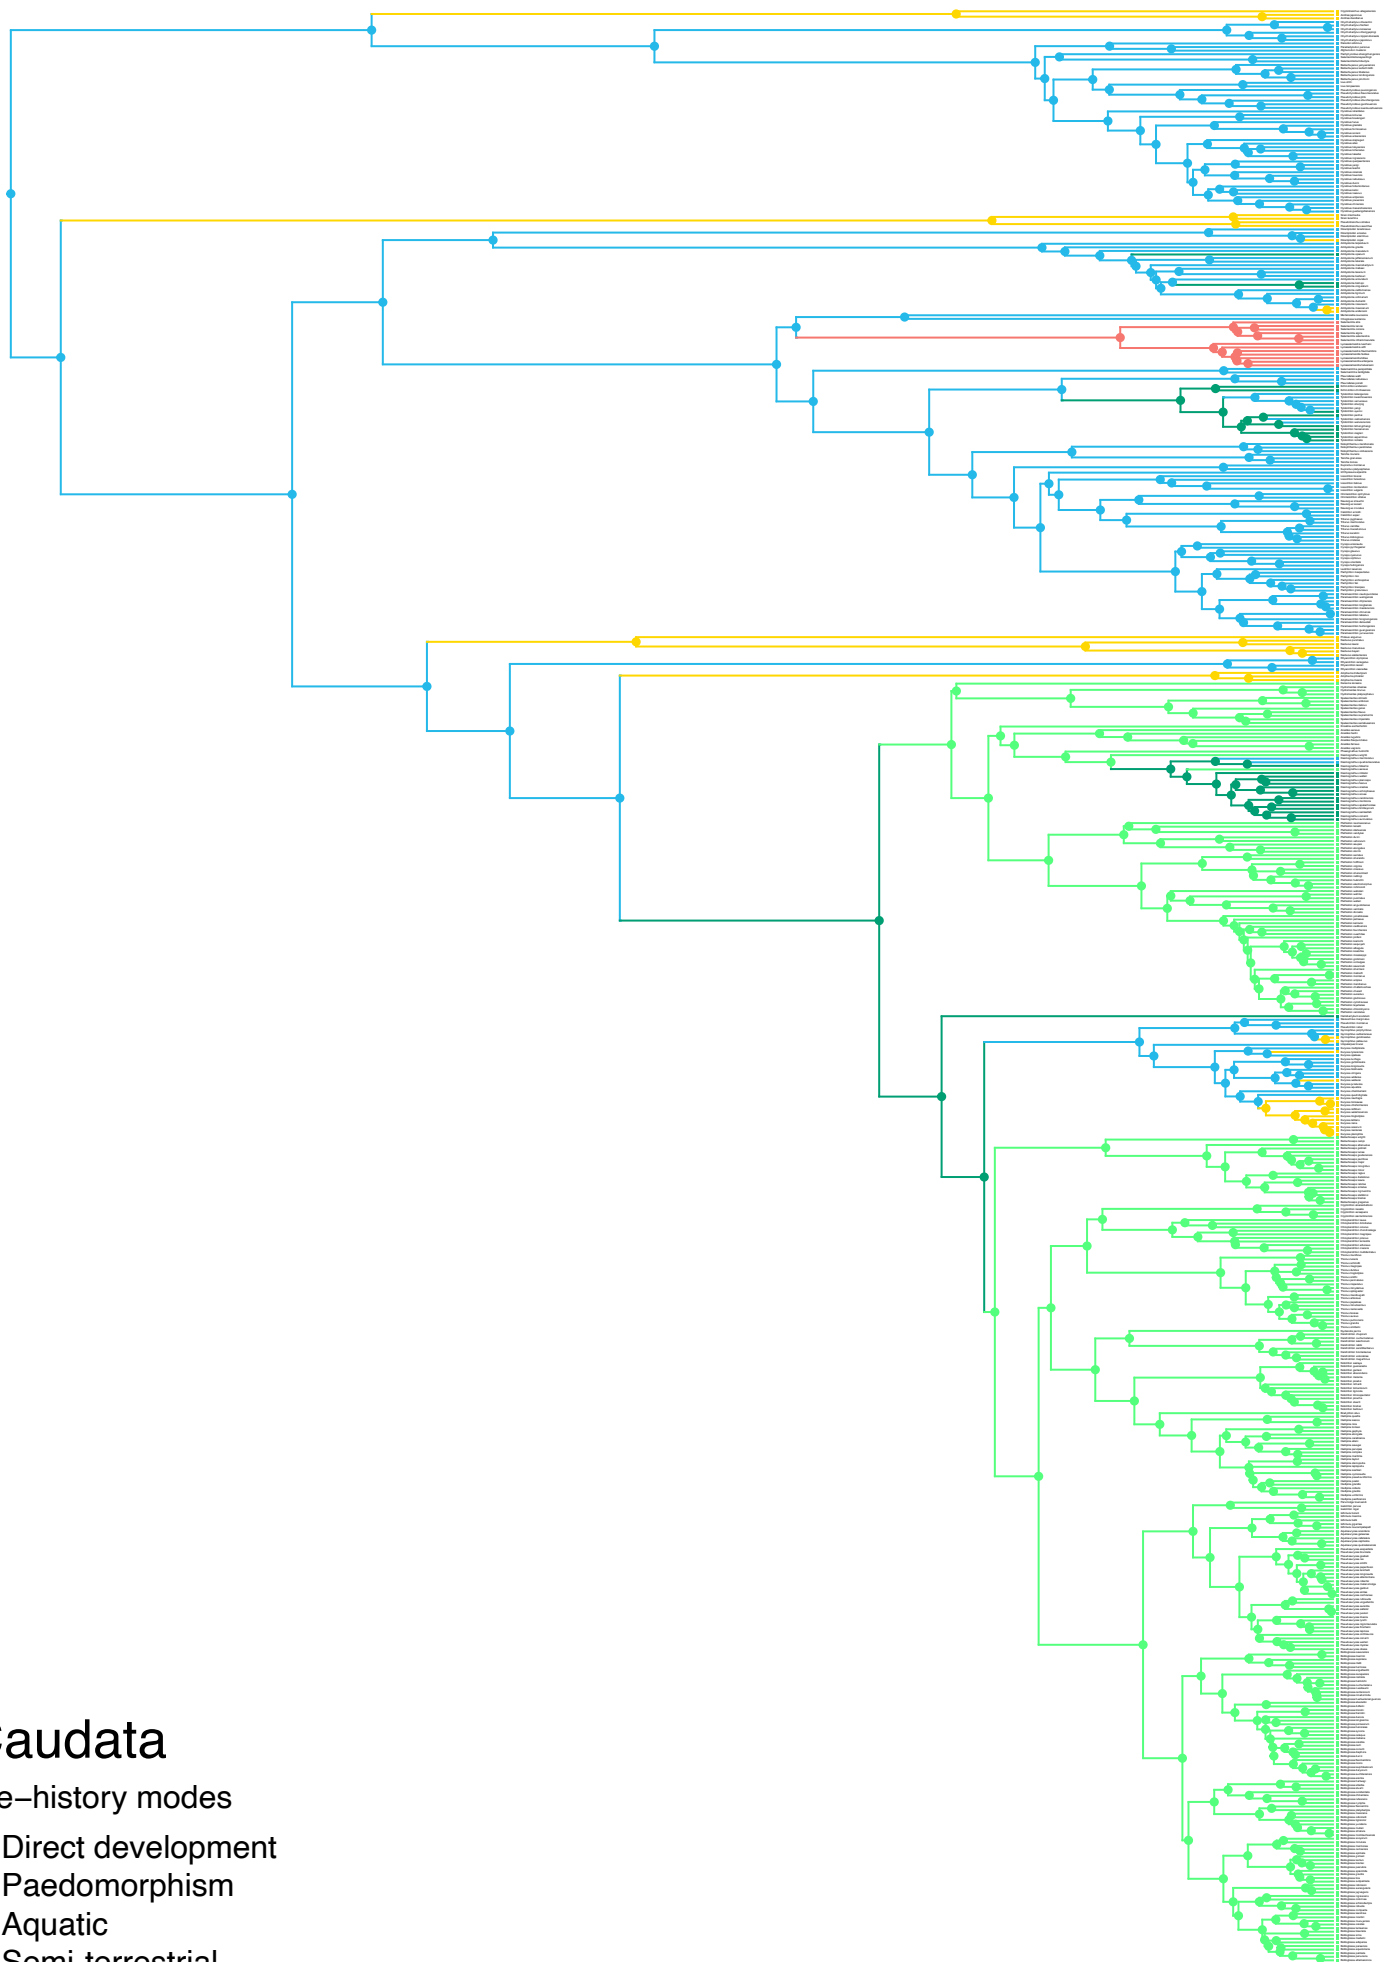

Supplementary Figure 2: Ancestral state estimates of reproductive modes for Caudata based on best-fitting corHMM model parameters and the joint estimation method. States are mapped onto the phylogeny with nodes and associated upstream branches coloured based on the estimated node state. Blue = aquatic; dark green = semi-terrestrial; light green = direct development; red = live-bearing; yellow = paedomorphism.

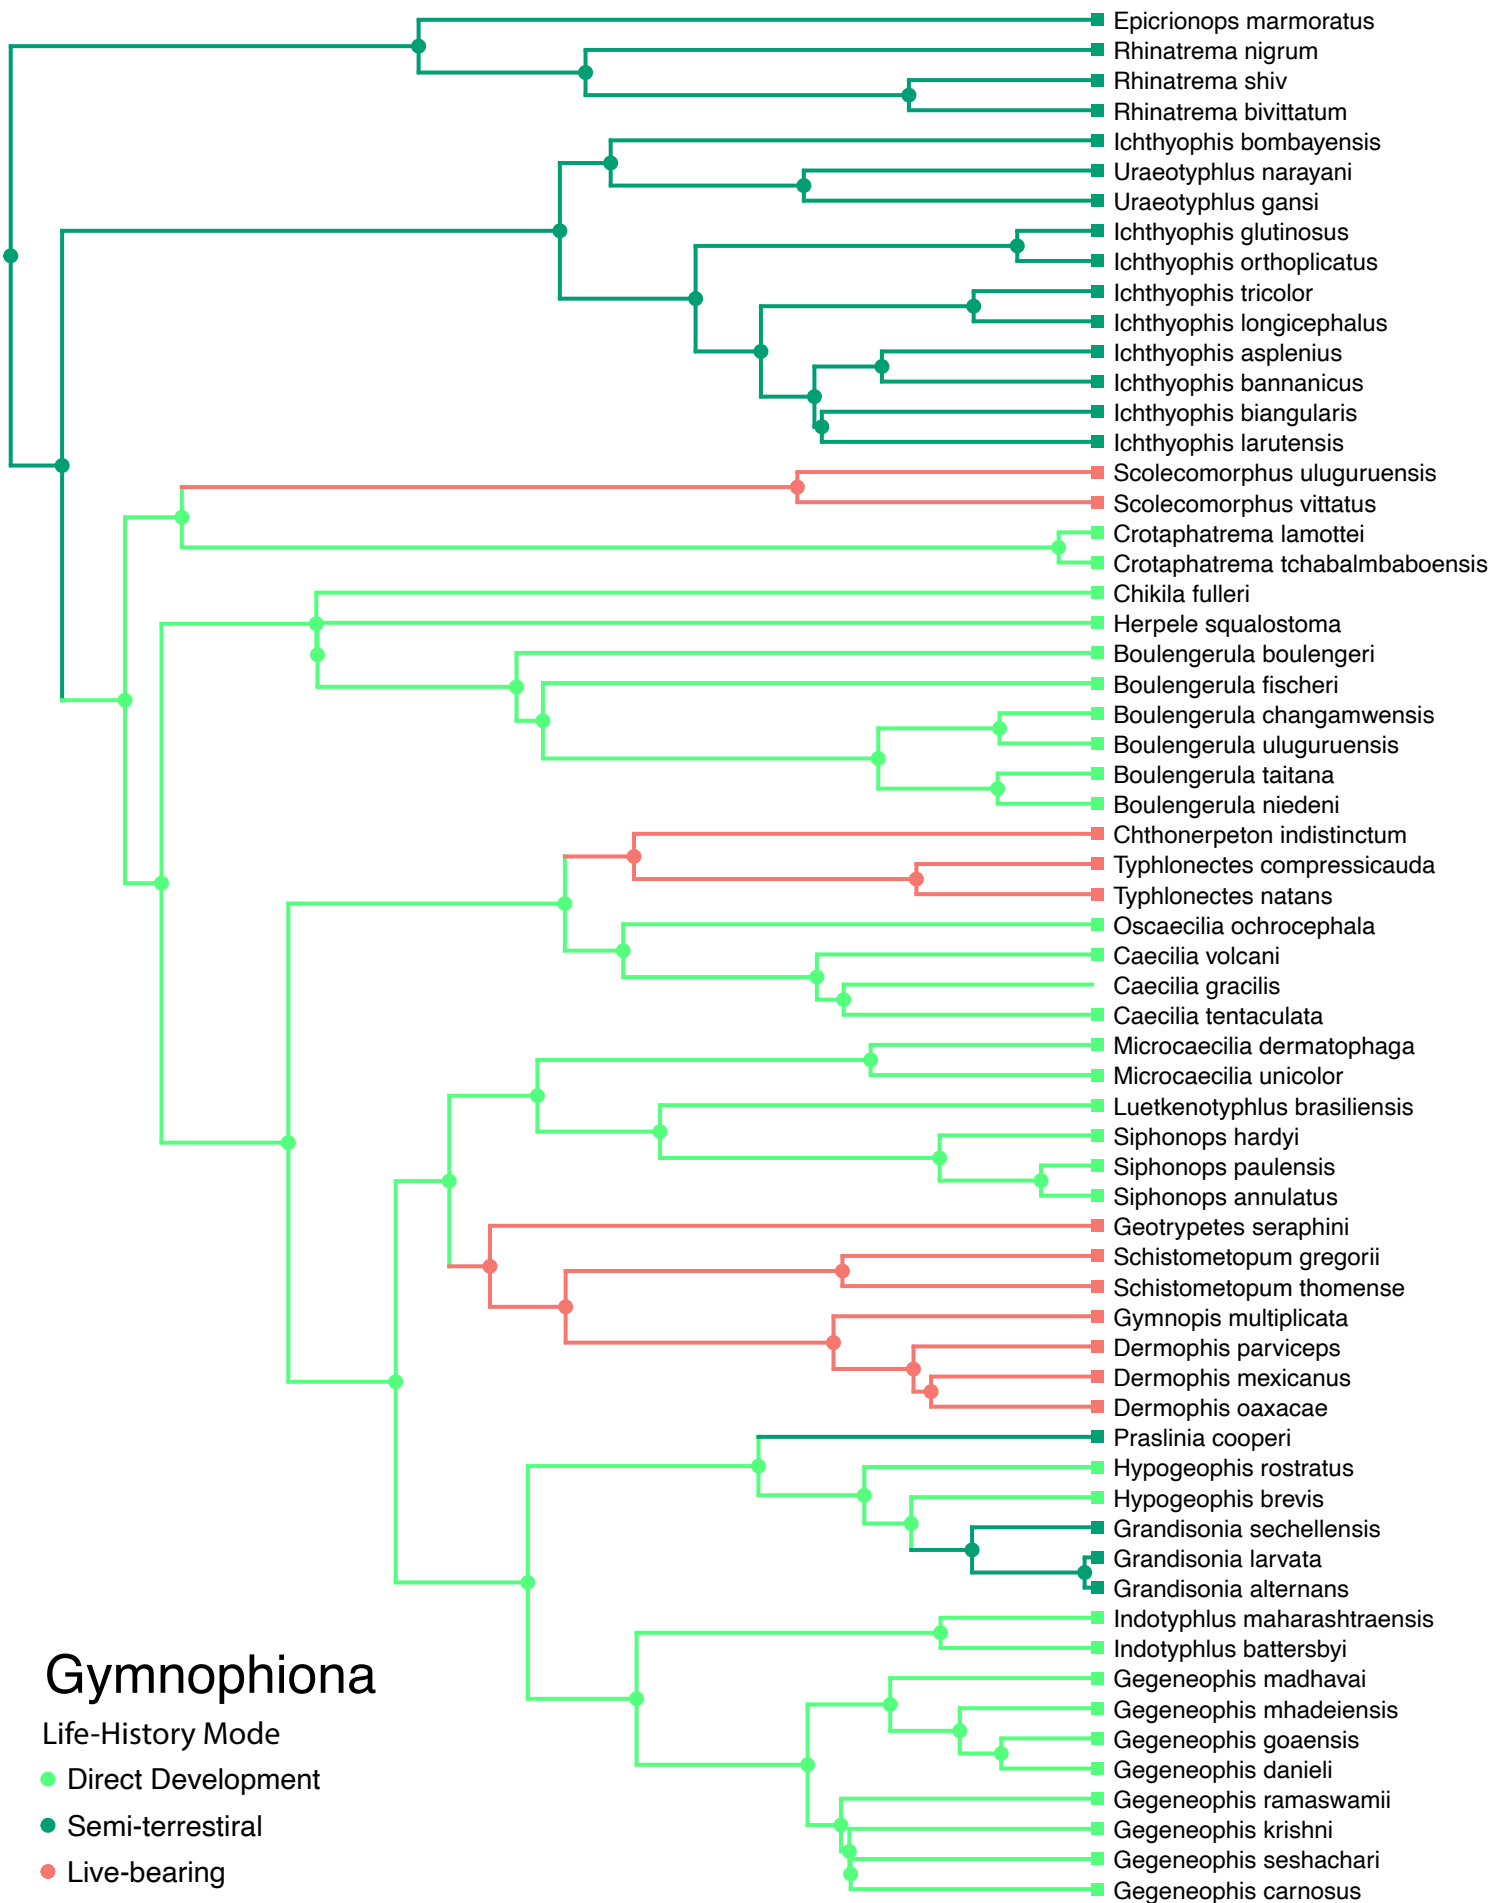

Supplementary Figure 3: Ancestral state estimates of reproductive modes for Gymnophiona, based on best-fitting corHMM model parameters and the joint estimation method. States are mapped onto the phylogeny with nodes and associated upstream branches coloured based on the estimated node state. Dark green = semi-terrestrial; light green = direct development; red = live-bearing.

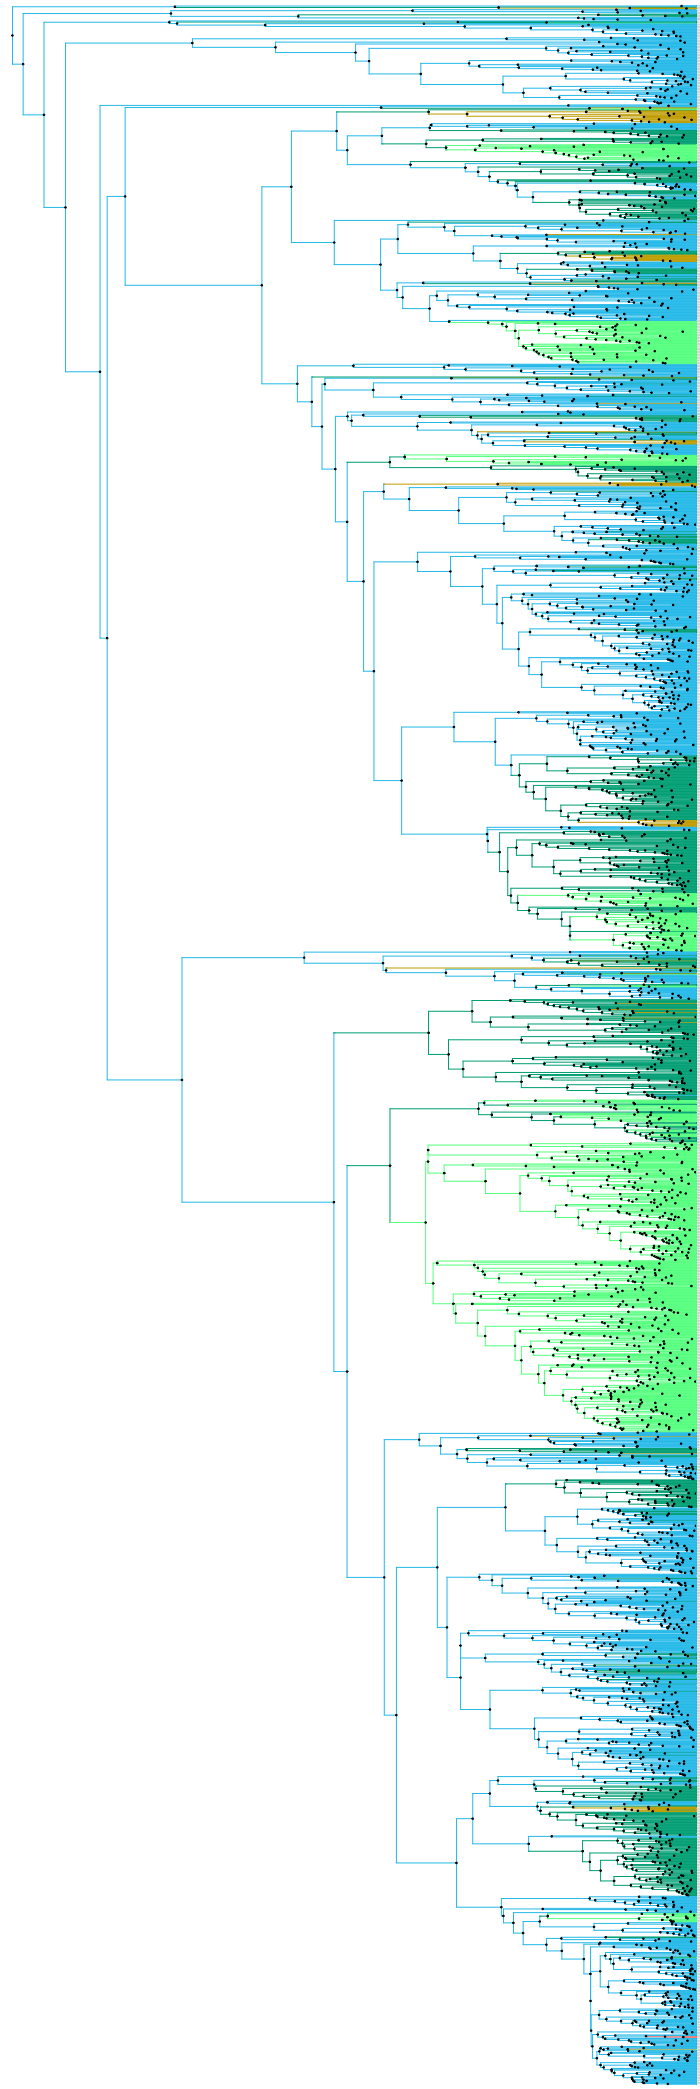

**Anura**  
 Life-history modes  
 • Aquatic  
 • Semi-terrestrial  
 • Terrestrial  
 • Live-bearing

Supplementary Figure 4: Ancestral state estimates of reproductive modes for Anura based on best-fitting corTMM model parameters and the stochastic character mapping method. States are mapped onto the phylogeny with nodes depicting pie charts of posterior probabilities of node states from 1000 simulations. Uninformative branches are coloured based on the largest proportion of the estimated node state. Blue = aquatic; dark green = semi-terrestrial; brown = terrestrial; light green = direct development; red = live-bearing

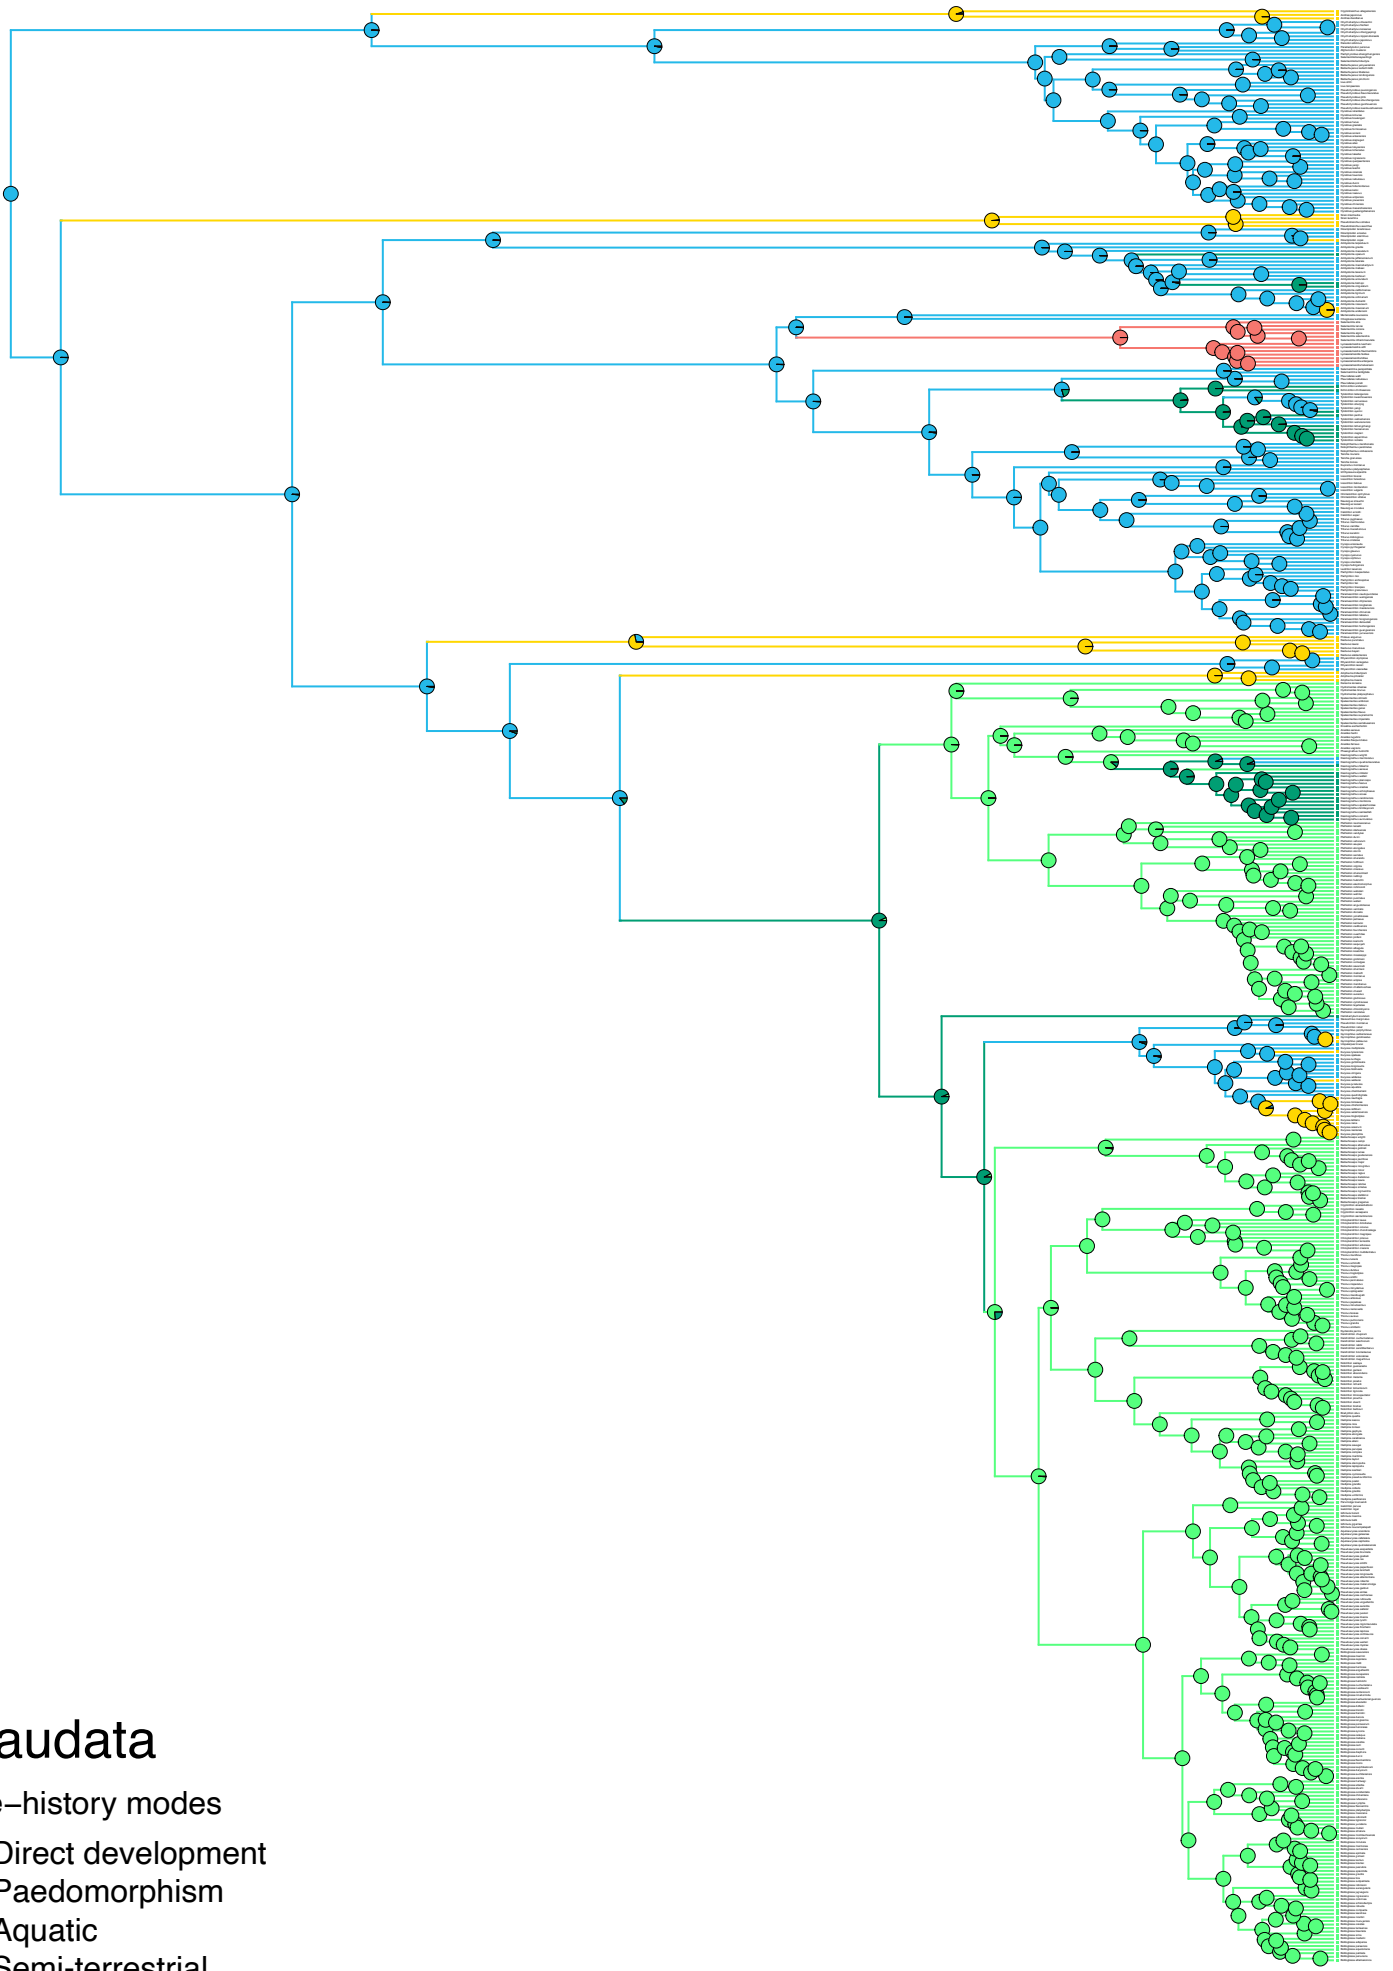

# Caudata

## Life-history modes

- Direct development
- Paedomorphism
- Aquatic
- Semi-terrestrial
- Live-bearing

Supplementary Figure 5: Ancestral state estimates of reproductive modes for Caudata based on best-fitting corHMM model parameters and the stochastic character mapping method. States are mapped onto the phylogeny with nodes depicting pie charts of posterior probabilities of node states from 1000 simulations. Upstream branches are coloured based on the largest proportion of the estimated node state. Blue = aquatic; dark green = semi-terrestrial; light green = direct development; red = live-bearing; yellow = paedomorphism.



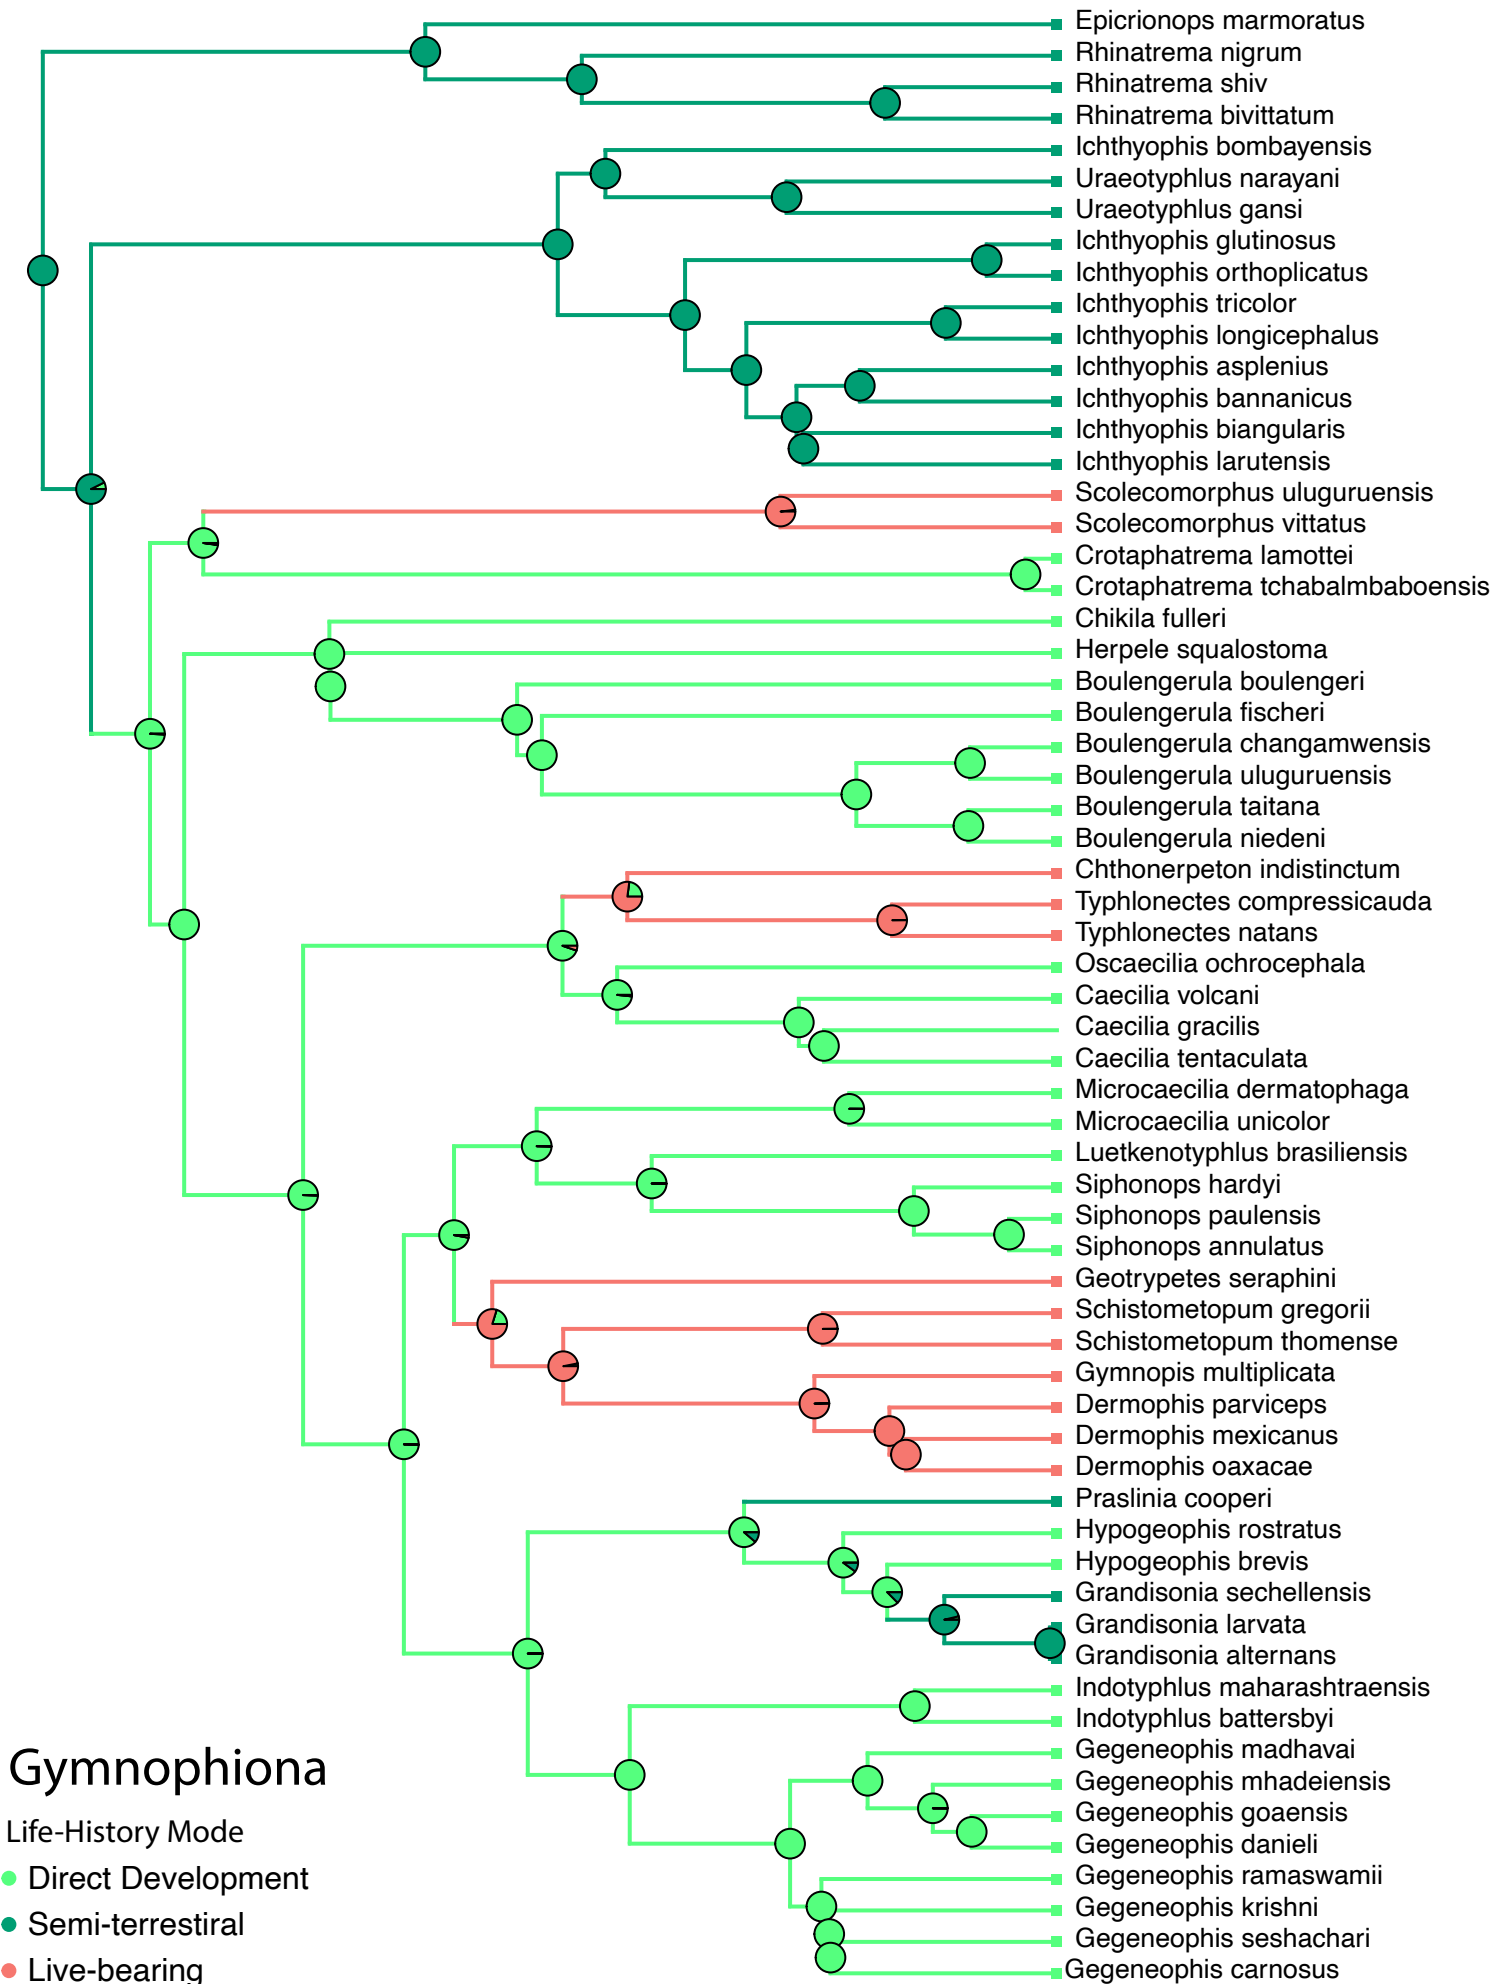

Supplementary Figure 6: Ancestral state estimates of reproductive modes for Gymnophiona based on best-fitting corHMM model parameters and the stochastic character mapping method. States are mapped onto the phylogeny with nodes depicting pie charts of posterior probabilities of node states from 1000 simulations. Upstream branches are coloured based on the largest proportion of the estimated node state. Dark green = semi-terrestrial; light green = direct development; red = live-bearing.

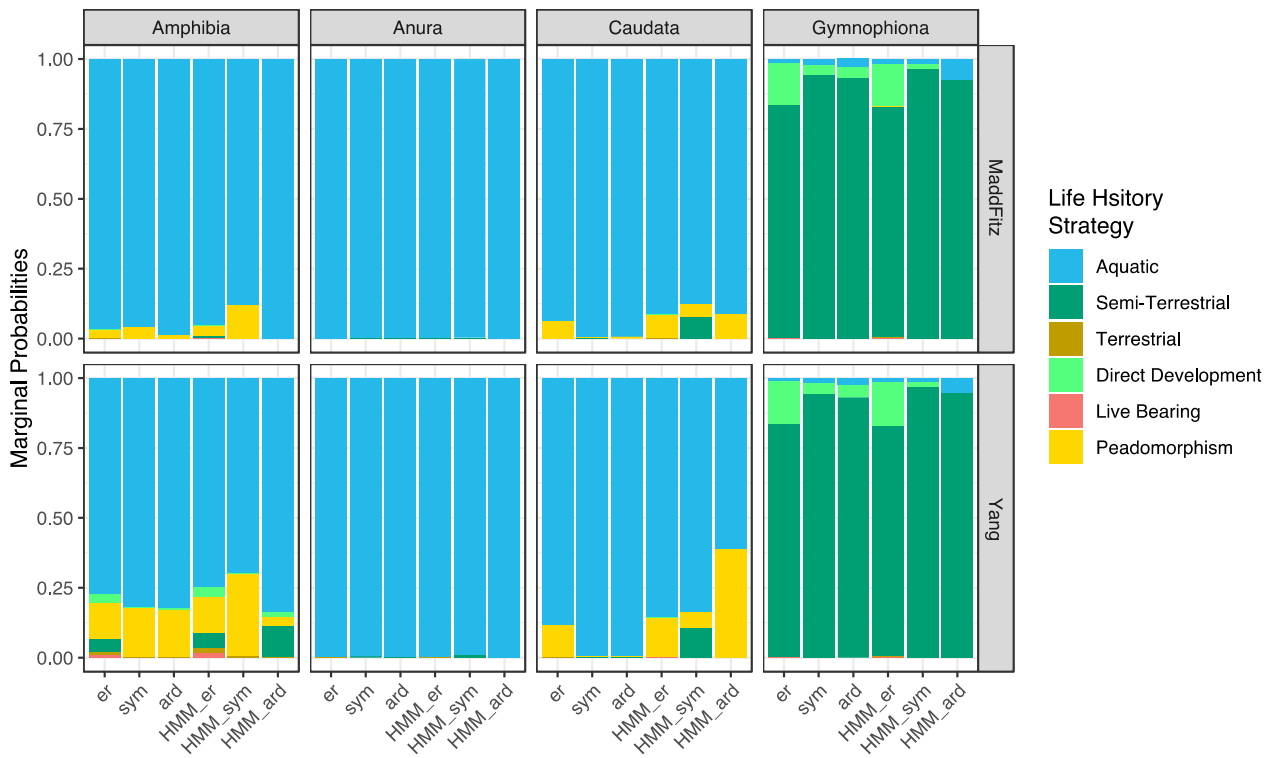

**Supplementary Figure 7:** Marginal probabilities of reproductive mode of the most recent common ancestor of all amphibians and for Anura, Caudata and Gymnophiona. Probabilities were estimated using transition rates estimated from different models (er= equal rates; sym=symmetric rates; ard=all rates different), without and with hidden states (HMM=hidden Markov model) and two different root prior methods, MaddFitz and Yang, using corHMM. Blue = aquatic; dark green = semi-terrestrial; brown = terrestrial; light green = direct development; red = live-bearing, yellow = pedomorphism.

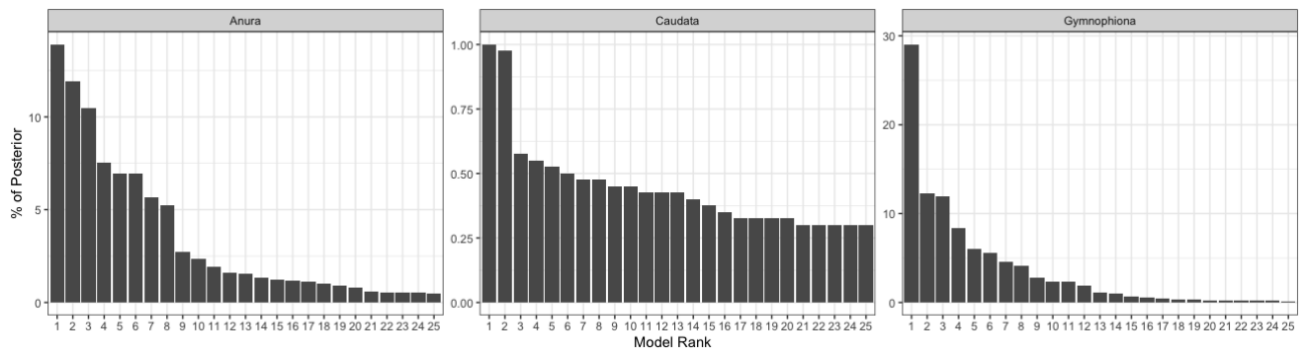

**Supplementary Figure 8:** Representation (% of the posterior) of the 25 most frequent models sampled by the covarion BayesTraits Multistate algorithms with reverse jump MCMC for Anura, Caudata and Gymnophiona.

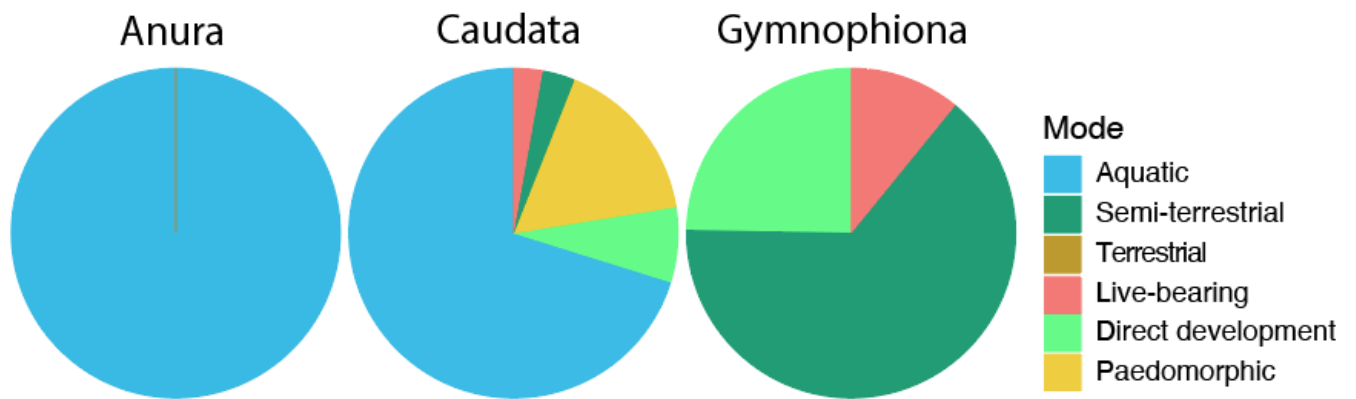

**Supplementary Figure 9:** Pie charts showing the mean posterior probabilities of root states per amphibian group (Anura, Caudata and Gymnophiona) as estimated using the covarion BayesTraits Multistate algorithms with reverse jump MCMC. Blue = aquatic; dark green = semi-terrestrial; brown = terrestrial; light green = direct development; red = live-bearing, yellow = paedomorphism.

**Supplementary Table 1.** corHMM model fits for Anura. Model names refer to those described in Figure 2. For each model, rate class refers to whether models included observed only (Mk) or observed plus one set of hidden states (HMM). Each model was run with either no rate restrictions (ARD), rates fixed to be all equal (ER) or to be symmetrical (SYM). Model performance metrics given are: log likelihood, Akaike Information Criterion (AIC), the difference in AIC score between the best model and the model being compared (dAIC) and Akaike Weights, a measure of the conditional probabilities for each model (weights add up to 1).

| Model Name         | Transitions | Rate Class | Log Likelihood | AIC      | dAIC    | Akaike Weights |
|--------------------|-------------|------------|----------------|----------|---------|----------------|
| Semi-sequential V1 | ARD         | HMM        | -667.664       | 1361.328 | 0.000   | 0.732          |
| Semi-sequential V2 | ARD         | HMM        | -668.674       | 1363.347 | 2.019   | 0.267          |
| Null               | ARD         | HMM        | -660.185       | 1374.370 | 13.042  | 0.001          |
| Semi-sequential V3 | ARD         | HMM        | -676.836       | 1379.672 | 18.343  | 0.000          |
| Non-sequential     | ARD         | HMM        | -684.275       | 1394.550 | 33.222  | 0.000          |
| Null               | SYM         | HMM        | -688.729       | 1419.459 | 58.130  | 0.000          |
| Semi-sequential V1 | SYM         | HMM        | -700.843       | 1419.686 | 58.358  | 0.000          |
| Semi-sequential V2 | SYM         | HMM        | -705.200       | 1428.399 | 67.071  | 0.000          |
| Semi-sequential V3 | SYM         | HMM        | -712.204       | 1442.408 | 81.079  | 0.000          |
| Null               | ARD         | Mk         | -714.653       | 1455.306 | 93.977  | 0.000          |
| Null               | SYM         | Mk         | -719.684       | 1459.368 | 98.040  | 0.000          |
| Semi-sequential V3 | ER          | HMM        | -728.355       | 1462.711 | 101.382 | 0.000          |
| Semi-sequential V2 | ER          | HMM        | -728.790       | 1463.580 | 102.252 | 0.000          |
| Semi-sequential V1 | ARD         | Mk         | -729.936       | 1471.873 | 110.544 | 0.000          |
| Semi-sequential V1 | SYM         | Mk         | -735.069       | 1478.137 | 116.809 | 0.000          |
| Semi-sequential V2 | ARD         | Mk         | -733.921       | 1479.842 | 118.514 | 0.000          |
| Non-sequential     | SYM         | HMM        | -734.232       | 1486.464 | 125.136 | 0.000          |
| Semi-sequential V2 | SYM         | Mk         | -739.280       | 1486.561 | 125.232 | 0.000          |
| Sequential         | ARD         | HMM        | -734.602       | 1491.204 | 129.875 | 0.000          |
| Semi-sequential V3 | ARD         | Mk         | -741.880       | 1495.760 | 134.432 | 0.000          |
| Semi-sequential V3 | SYM         | Mk         | -747.508       | 1503.016 | 141.687 | 0.000          |
| Semi-sequential V1 | ER          | HMM        | -756.174       | 1518.347 | 157.019 | 0.000          |
| Semi-sequential V2 | ER          | Mk         | -771.555       | 1545.110 | 183.781 | 0.000          |
| Sequential         | SYM         | HMM        | -766.812       | 1551.623 | 190.295 | 0.000          |
| Semi-sequential V3 | ER          | Mk         | -777.249       | 1556.498 | 195.169 | 0.000          |
| Semi-sequential V1 | ER          | Mk         | -786.500       | 1575.000 | 213.672 | 0.000          |
| Null               | ER          | HMM        | -785.049       | 1576.097 | 214.769 | 0.000          |
| Sequential         | ER          | HMM        | -793.774       | 1593.548 | 232.219 | 0.000          |
| Null               | ER          | Mk         | -814.303       | 1630.606 | 269.278 | 0.000          |
| Non-sequential     | ER          | HMM        | -813.797       | 1633.593 | 272.265 | 0.000          |
| Non-sequential     | SYM         | Mk         | -813.102       | 1634.204 | 272.876 | 0.000          |
| Non-sequential     | ARD         | Mk         | -812.917       | 1637.834 | 276.506 | 0.000          |
| Sequential         | ARD         | Mk         | -834.604       | 1679.208 | 317.879 | 0.000          |
| Sequential         | SYM         | Mk         | -838.276       | 1684.553 | 323.224 | 0.000          |
| Sequential         | ER          | Mk         | -864.860       | 1731.720 | 370.391 | 0.000          |
| Non-sequential     | ER          | Mk         | -885.517       | 1773.033 | 411.705 | 0.000          |

**Supplementary Table 2.** coHMM model fits for Caudata. Model names refer to those described in Figure 2. For each model, rate class refers to whether models included observed only (Mk) or observed plus one set of hidden states (HMM). Model performance metrics given are: log likelihood, Akaike Information Criterion (AIC), the difference in AIC score between the best model and the model being compared (dAIC) and Akaike Weights, a measure of the conditional probabilities for each model (weights add up to 1).

| Model Name         | Transitions | Rate Class | Log Likelihood | AIC     | dAIC   | Akaike Weights |
|--------------------|-------------|------------|----------------|---------|--------|----------------|
| Semi-sequential V1 | ARD         | Mk         | -109.430       | 232.861 | 0.000  | 0.454          |
| Semi-sequential V2 | ER          | HMM        | -114.032       | 234.064 | 1.203  | 0.249          |
| Semi-sequential V2 | ARD         | Mk         | -110.874       | 235.747 | 2.886  | 0.107          |
| Semi-sequential V1 | SYM         | HMM        | -108.941       | 235.881 | 3.020  | 0.100          |
| Non-sequential     | SYM         | HMM        | -110.256       | 238.512 | 5.651  | 0.027          |
| Semi-sequential V1 | ER          | HMM        | -116.732       | 239.463 | 6.602  | 0.017          |
| Sequential         | ER          | HMM        | -117.079       | 240.158 | 7.298  | 0.012          |
| Semi-sequential V2 | SYM         | HMM        | -111.175       | 240.351 | 7.490  | 0.011          |
| Semi-sequential V2 | ARD         | HMM        | -105.066       | 240.132 | 7.271  | 0.012          |
| Non-sequential     | ARD         | HMM        | -105.868       | 241.736 | 8.875  | 0.005          |
| Sequential         | ARD         | Mk         | -114.358       | 242.715 | 9.854  | 0.003          |
| Non-sequential     | ER          | HMM        | -119.783       | 245.565 | 12.705 | 0.001          |
| Sequential         | ARD         | HMM        | -107.662       | 245.324 | 12.463 | 0.001          |
| Semi-sequential V2 | ER          | Mk         | -123.282       | 248.564 | 15.704 | 0.000          |
| Semi-sequential V1 | ARD         | HMM        | -108.988       | 247.977 | 15.116 | 0.000          |
| Sequential         | SYM         | HMM        | -115.284       | 248.568 | 15.707 | 0.000          |
| Semi-sequential V1 | SYM         | Mk         | -120.791       | 249.583 | 16.722 | 0.000          |
| Non-sequential     | ARD         | Mk         | -117.979       | 249.957 | 17.096 | 0.000          |
| Semi-sequential V2 | SYM         | Mk         | -121.626       | 251.253 | 18.392 | 0.000          |
| Null               | ARD         | Mk         | -109.430       | 250.861 | 18.000 | 0.000          |
| Non-sequential     | SYM         | Mk         | -122.263       | 252.527 | 19.666 | 0.000          |
| Semi-sequential V1 | ER          | Mk         | -126.694       | 255.387 | 22.526 | 0.000          |
| Null               | ER          | HMM        | -125.149       | 256.299 | 23.438 | 0.000          |
| Null               | SYM         | Mk         | -118.721       | 257.442 | 24.581 | 0.000          |
| Null               | SYM         | HMM        | -108.261       | 258.523 | 25.662 | 0.000          |
| Non-sequential     | ER          | Mk         | -129.644       | 261.288 | 28.427 | 0.000          |
| Sequential         | SYM         | Mk         | -127.103       | 262.206 | 29.345 | 0.000          |
| Sequential         | ER          | Mk         | -132.632       | 267.263 | 34.402 | 0.000          |
| Null               | ER          | Mk         | -134.830       | 271.660 | 38.799 | 0.000          |
| Null               | ARD         | HMM        | -100.729       | 267.459 | 34.598 | 0.000          |

**Supplementary Table 3.** coHMM model fits for Gymnophiona. Model names refer to those described in Figure 2. For each model, rate class refers to whether models included observed only (Mk) or observed plus one set of hidden states (HMM). Model performance metrics given are: log likelihood, Akaike Information Criterion (AIC), the difference in AIC score between the best model and the model being compared (dAIC) and Akaike Weights, a measure of the conditional probabilities for each model (weights add up to 1).

| Model Name         | Transitions | Rate Class | Log Likelihood | AIC    | dAIC   | Akaike Weights |
|--------------------|-------------|------------|----------------|--------|--------|----------------|
| Sequential         | ER          | Mk         | -29.045        | 60.089 | 0.000  | 0.421          |
| Sequential         | SYM         | Mk         | -28.987        | 61.973 | 1.884  | 0.164          |
| Sequential         | ER          | HMM        | -28.085        | 62.171 | 2.081  | 0.149          |
| Null               | ER          | Mk         | -30.690        | 63.380 | 3.291  | 0.081          |
| Null               | SYM         | Mk         | -28.987        | 63.973 | 3.884  | 0.060          |
| Sequential         | ARD         | Mk         | -28.172        | 64.343 | 4.254  | 0.050          |
| Null               | ER          | HMM        | -29.633        | 65.266 | 5.177  | 0.032          |
| Sequential         | SYM         | HMM        | -28.057        | 66.113 | 6.024  | 0.021          |
| Null               | ARD         | Mk         | -28.172        | 68.343 | 8.254  | 0.007          |
| Semi-sequential V2 | ARD         | HMM        | -24.951        | 67.901 | 7.812  | 0.008          |
| Null               | SYM         | HMM        | -28.057        | 70.113 | 10.024 | 0.003          |
| Semi-sequential V2 | ER          | HMM        | -33.614        | 73.227 | 13.138 | 0.001          |
| Sequential         | ARD         | HMM        | -26.133        | 70.267 | 10.178 | 0.003          |
| Semi-sequential V2 | ARD         | Mk         | -32.517        | 73.034 | 12.945 | 0.001          |
| Semi-sequential V2 | ER          | Mk         | -37.387        | 76.774 | 16.685 | 0.000          |
| Semi-sequential V2 | SYM         | HMM        | -33.566        | 77.132 | 17.043 | 0.000          |
| Semi-sequential V2 | SYM         | Mk         | -37.313        | 78.626 | 18.536 | 0.000          |
| Null               | ARD         | HMM        | -24.951        | 75.901 | 15.812 | 0.000          |

**Supplementary Table 4.** coHMM model fits for Anura, where “S” and “T” trait states have been combined so that there are only four states (see methods). Model names refer to those described in Figure 2. For each model, rate class refers to whether models included observed only (Mk) or observed plus one set of hidden states (HMM). Model performance metrics given are: log likelihood, Akaike Information Criterion (AIC), the difference in AIC score between the best model and the model being compared (dAIC) and Akaike Weights, a measure of the conditional probabilities for each model (weights add up to 1).

| Model Name                | Transitions | Rate Class | Log Likelihood | AIC      | dAIC    | Akaïke Weights |
|---------------------------|-------------|------------|----------------|----------|---------|----------------|
| <b>Semi-sequential V1</b> | ARD         | HMM        | -557.942       | 1137.885 | 0.000   | 0.791          |
| <b>Semi-sequential V2</b> | ARD         | HMM        | -559.288       | 1140.576 | 2.691   | 0.206          |
| <b>Non-sequential</b>     | ARD         | HMM        | -563.734       | 1149.468 | 11.583  | 0.002          |
| <b>Null</b>               | ARD         | HMM        | -556.555       | 1151.111 | 13.226  | 0.001          |
| <b>Sequential</b>         | ARD         | HMM        | -567.399       | 1156.797 | 18.912  | 0.000          |
| <b>Null</b>               | SYM         | HMM        | -586.565       | 1199.130 | 61.245  | 0.000          |
| <b>Semi-sequential V1</b> | SYM         | HMM        | -598.646       | 1211.291 | 73.406  | 0.000          |
| <b>Semi-sequential V2</b> | SYM         | HMM        | -602.965       | 1219.931 | 82.046  | 0.000          |
| <b>Sequential</b>         | SYM         | HMM        | -608.826       | 1231.652 | 93.767  | 0.000          |
| <b>Non-sequential</b>     | SYM         | HMM        | -609.160       | 1232.320 | 94.435  | 0.000          |
| <b>Null</b>               | ARD         | Mk         | -608.389       | 1234.777 | 96.892  | 0.000          |
| <b>Null</b>               | SYM         | Mk         | -615.590       | 1243.180 | 105.295 | 0.000          |
| <b>Semi-sequential V1</b> | ARD         | Mk         | -620.046       | 1250.092 | 112.207 | 0.000          |
| <b>Sequential</b>         | ER          | HMM        | -624.372       | 1254.743 | 116.858 | 0.000          |
| <b>Semi-sequential V2</b> | ARD         | Mk         | -624.161       | 1258.323 | 120.438 | 0.000          |
| <b>Semi-sequential V1</b> | SYM         | Mk         | -626.488       | 1258.977 | 121.092 | 0.000          |
| <b>Semi-sequential V2</b> | ER          | HMM        | -629.286       | 1264.571 | 126.686 | 0.000          |
| <b>Semi-sequential V2</b> | SYM         | Mk         | -630.868       | 1267.736 | 129.851 | 0.000          |
| <b>Sequential</b>         | ARD         | Mk         | -632.080       | 1274.160 | 136.275 | 0.000          |
| <b>Sequential</b>         | SYM         | Mk         | -639.005       | 1284.010 | 146.125 | 0.000          |
| <b>Semi-sequential V1</b> | ER          | HMM        | -651.113       | 1308.227 | 170.342 | 0.000          |
| <b>Semi-sequential V2</b> | ER          | Mk         | -664.537       | 1331.074 | 193.189 | 0.000          |
| <b>Sequential</b>         | ER          | Mk         | -668.448       | 1338.896 | 201.011 | 0.000          |
| <b>Non-sequential</b>     | ARD         | Mk         | -665.076       | 1340.151 | 202.266 | 0.000          |
| <b>Non-sequential</b>     | SYM         | Mk         | -669.801       | 1345.602 | 207.717 | 0.000          |
| <b>Semi-sequential V1</b> | ER          | Mk         | -676.849       | 1355.699 | 217.814 | 0.000          |
| <b>Null</b>               | ER          | HMM        | -680.179       | 1366.359 | 228.474 | 0.000          |
| <b>Non-sequential</b>     | ER          | HMM        | -688.119       | 1382.237 | 244.352 | 0.000          |
| <b>Null</b>               | ER          | Mk         | -707.263       | 1416.526 | 278.641 | 0.000          |
| <b>Non-sequential</b>     | ER          | Mk         | -734.995       | 1471.991 | 334.106 | 0.000          |



**Supplementary Table 5a.** corHMM model fits for Anura, without species with “inferred” and unknown (NA) life history coding. Model names refer to those described in Figure 2. For each model, rate class refers to whether models included observed only (Mk) or observed plus one set of hidden states (HMM). Model performance metrics given are: log likelihood, Akaike Information Criterion (AIC), the difference in AIC score between the best model and the model being compared (dAIC) and Akaike Weights, a measure of the conditional probabilities for each model (weights add up to 1).

| Model Name         | Transitions | Rate Class | Log Likelihood | AIC      | dAIC     | Akaike Weights |
|--------------------|-------------|------------|----------------|----------|----------|----------------|
| Semi-sequential V1 | ARD         | HMM        | -582.940       | 1191.880 | 1191.987 | 0.999          |
| Semi-sequential V2 | ARD         | HMM        | -590.793       | 1207.585 | 1207.692 | 0.000          |
| Null               | ARD         | HMM        | -577.308       | 1208.616 | 1209.062 | 0.000          |
| Non-sequential     | ARD         | HMM        | -596.943       | 1219.886 | 1219.993 | 0.000          |
| Semi-sequential V3 | ARD         | HMM        | -600.437       | 1226.874 | 1226.981 | 0.000          |
| Semi-sequential V1 | SYM         | HMM        | -610.506       | 1239.011 | 1239.064 | 0.000          |
| Null               | SYM         | HMM        | -603.853       | 1249.707 | 1249.979 | 0.000          |
| Semi-sequential V2 | SYM         | HMM        | -619.074       | 1256.148 | 1256.201 | 0.000          |
| Null               | ARD         | Mk         | -624.085       | 1274.169 | 1274.276 | 0.000          |
| Semi-sequential V3 | SYM         | HMM        | -628.257       | 1274.513 | 1274.566 | 0.000          |
| Null               | SYM         | Mk         | -627.902       | 1275.804 | 1275.869 | 0.000          |
| Semi-sequential V2 | ER          | HMM        | -639.730       | 1285.459 | 1285.466 | 0.000          |
| Semi-sequential V1 | ARD         | Mk         | -638.494       | 1288.988 | 1289.012 | 0.000          |
| Semi-sequential V3 | ER          | HMM        | -641.731       | 1289.461 | 1289.468 | 0.000          |
| Semi-sequential V1 | SYM         | Mk         | -642.583       | 1293.165 | 1293.177 | 0.000          |
| Non-sequential     | SYM         | HMM        | -639.005       | 1296.010 | 1296.063 | 0.000          |
| Semi-sequential V2 | ARD         | Mk         | -645.305       | 1302.610 | 1302.635 | 0.000          |
| Semi-sequential V2 | SYM         | Mk         | -649.723       | 1307.445 | 1307.457 | 0.000          |
| Sequential         | ARD         | HMM        | -650.545       | 1323.091 | 1323.168 | 0.000          |
| Semi-sequential V3 | ARD         | Mk         | -655.836       | 1323.673 | 1323.697 | 0.000          |
| Semi-sequential V1 | ER          | HMM        | -661.487       | 1328.974 | 1328.981 | 0.000          |
| Semi-sequential V3 | SYM         | Mk         | -660.991       | 1329.981 | 1329.993 | 0.000          |
| Semi-sequential V2 | ER          | Mk         | -677.567       | 1357.133 | 1357.134 | 0.000          |
| Null               | ER          | HMM        | -684.553       | 1375.106 | 1375.113 | 0.000          |
| Semi-sequential V3 | ER          | Mk         | -686.560       | 1375.119 | 1375.120 | 0.000          |
| Sequential         | SYM         | HMM        | -678.689       | 1375.377 | 1375.430 | 0.000          |
| Semi-sequential V1 | ER          | Mk         | -688.322       | 1378.643 | 1378.644 | 0.000          |
| Sequential         | ER          | HMM        | -703.411       | 1412.821 | 1412.828 | 0.000          |
| Non-sequential     | SYM         | Mk         | -706.547       | 1421.094 | 1421.106 | 0.000          |
| Null               | ER          | Mk         | -710.387       | 1422.775 | 1422.776 | 0.000          |
| Non-sequential     | ARD         | Mk         | -706.361       | 1424.722 | 1424.746 | 0.000          |
| Non-sequential     | ER          | HMM        | -709.406       | 1424.812 | 1424.819 | 0.000          |
| Sequential         | ARD         | Mk         | -744.489       | 1498.978 | 1498.996 | 0.000          |
| Sequential         | SYM         | Mk         | -746.922       | 1501.844 | 1501.855 | 0.000          |
| Non-sequential     | ER          | Mk         | -769.244       | 1540.487 | 1540.488 | 0.000          |
| Sequential         | ER          | Mk         | -771.921       | 1545.843 | 1545.844 | 0.000          |

**Supplementary Table 5b.** corHMM model fits for Caudata, without species with “inferred” and unknown (NA) life history coding. Model names refer to those described in Figure 2. For each model, rate class refers to whether models included observed only (Mk) or observed plus one set of hidden states (HMM). Model performance metrics given are: log likelihood, Akaike Information Criterion (AIC), the difference in AIC score between the best model and the model being compared (dAIC) and Akaike Weights, a measure of the conditional probabilities for each model (weights add up to 1).

| Model Name         | Transitions | Rate Class | Log Likelihood | AIC     | dAIC    | Akaike Weights |
|--------------------|-------------|------------|----------------|---------|---------|----------------|
| Semi-sequential V1 | ARD         | Mk         | -109.203       | 232.406 | 232.614 | 0.436          |
| Semi-sequential V2 | ER          | HMM        | -113.965       | 233.930 | 233.975 | 0.221          |
| Semi-sequential V2 | ARD         | Mk         | -110.640       | 235.280 | 235.488 | 0.104          |
| Semi-sequential V1 | ARD         | HMM        | -102.413       | 234.825 | 235.731 | 0.092          |
| Semi-sequential V1 | SYM         | HMM        | -108.865       | 235.731 | 236.066 | 0.078          |
| Non-sequential     | SYM         | HMM        | -110.184       | 238.369 | 238.704 | 0.021          |
| Semi-sequential V1 | ER          | HMM        | -116.661       | 239.322 | 239.366 | 0.015          |
| Sequential         | ER          | HMM        | -117.023       | 240.045 | 240.089 | 0.010          |
| Semi-sequential V2 | SYM         | HMM        | -111.102       | 240.204 | 240.540 | 0.008          |
| Semi-sequential V2 | ARD         | HMM        | -105.043       | 240.086 | 240.992 | 0.007          |
| Non-sequential     | ARD         | HMM        | -105.684       | 241.368 | 242.273 | 0.003          |
| Sequential         | ARD         | Mk         | -114.124       | 242.248 | 242.456 | 0.003          |
| Non-sequential     | ER          | HMM        | -119.711       | 245.422 | 245.466 | 0.001          |
| Sequential         | ARD         | HMM        | -107.599       | 245.198 | 246.104 | 0.001          |
| Semi-sequential V2 | ER          | Mk         | -123.061       | 248.121 | 248.129 | 0.000          |
| Sequential         | SYM         | HMM        | -115.211       | 248.423 | 248.759 | 0.000          |
| Semi-sequential V1 | SYM         | Mk         | -120.514       | 249.029 | 249.102 | 0.000          |
| Non-sequential     | ARD         | Mk         | -117.692       | 249.384 | 249.593 | 0.000          |
| Semi-sequential V2 | SYM         | Mk         | -121.347       | 250.695 | 250.769 | 0.000          |
| Null               | ARD         | Mk         | -109.203       | 250.406 | 251.434 | 0.000          |
| Non-sequential     | SYM         | Mk         | -121.972       | 251.944 | 252.018 | 0.000          |
| Semi-sequential V1 | ER          | Mk         | -126.443       | 254.885 | 254.893 | 0.000          |
| Null               | ER          | HMM        | -125.094       | 256.188 | 256.233 | 0.000          |
| Null               | SYM         | Mk         | -118.460       | 256.919 | 257.330 | 0.000          |
| Null               | SYM         | HMM        | -108.189       | 258.379 | 260.142 | 0.000          |
| Non-sequential     | ER          | Mk         | -129.382       | 260.763 | 260.771 | 0.000          |
| Sequential         | SYM         | Mk         | -126.822       | 261.645 | 261.719 | 0.000          |
| Sequential         | ER          | Mk         | -132.447       | 266.895 | 266.902 | 0.000          |
| Null               | ER          | Mk         | -134.684       | 271.369 | 271.376 | 0.000          |
| Null               | ARD         | HMM        | -100.553       | 267.106 | 271.489 | 0.000          |

**Supplementary Table 5c.** corHMM model fits for Gymnophiona, without species with “inferred” and unknown (“NA”) life history coding. Model names refer to those described in Figure 2. For each model, rate class refers to whether models included observed only (Mk) or observed plus one set of hidden states (HMM). Model performance metrics given are: log likelihood, Akaike Information Criterion (AIC), the difference in AIC score between the best model and the model being compared (dAIC) and Akaike Weights, a measure of the conditional probabilities for each model (weights add up to 1).

| Model Name         | Transitions | Rate Class | Log Likelihood | AIC    | dAIC   | Akaike Weights |
|--------------------|-------------|------------|----------------|--------|--------|----------------|
| Sequential         | ER          | Mk         | -21.471        | 44.941 | 45.007 | 0.365          |
| Sequential         | SYM         | Mk         | -21.253        | 46.506 | 46.706 | 0.156          |
| Null               | ER          | Mk         | -22.502        | 47.004 | 47.069 | 0.130          |
| Sequential         | ER          | HMM        | -20.436        | 46.872 | 47.278 | 0.117          |
| Sequential         | ARD         | Mk         | -19.953        | 47.907 | 48.596 | 0.061          |
| Null               | SYM         | Mk         | -21.253        | 48.506 | 48.913 | 0.052          |
| Null               | ER          | HMM        | -21.278        | 48.555 | 48.962 | 0.050          |
| Semi-sequential V2 | ER          | Mk         | -24.652        | 51.304 | 51.370 | 0.015          |
| Sequential         | SYM         | HMM        | -20.281        | 50.561 | 51.614 | 0.013          |
| Semi-sequential V2 | ER          | HMM        | -22.629        | 51.258 | 51.664 | 0.013          |
| Semi-sequential V2 | ARD         | Mk         | -21.504        | 51.008 | 51.698 | 0.013          |
| Null               | ARD         | Mk         | -19.933        | 51.867 | 53.367 | 0.006          |
| Semi-sequential V2 | SYM         | Mk         | -24.594        | 53.187 | 53.387 | 0.006          |
| Semi-sequential V2 | SYM         | HMM        | -22.531        | 55.063 | 56.115 | 0.001          |
| Null               | SYM         | HMM        | -20.281        | 54.561 | 56.598 | 0.001          |
| Semi-sequential V2 | ARD         | HMM        | -17.667        | 53.335 | 56.731 | 0.001          |
| Sequential         | ARD         | HMM        | -18.813        | 55.626 | 59.022 | 0.000          |
| Null               | ARD         | HMM        | -17.667        | 61.335 | 68.764 | 0.000          |

**Supplementary Table 6:** Ranking of model performance of state dependent speciation and extinction ‘secsse’ models for the three major groups of amphibians: Anura, Caudata and Gymnophiona, with extinction rates set to zero. Models fall into three categories: Constant diversification (CD), Reproductive-mode Dependent Diversification (RmDD; state-associated rate shifts, with or without hidden traits), Reproductive mode Independent Diversification (RmID; rate shifts only associated with states of hidden traits, not observed reproductive modes). RmDD models can have different numbers of hidden traits, resulting in different numbers of rate categories. Model performance metrics given are: Log likelihood (lnL), Akaike information criterion (AIC), the difference in AIC score between the best model and the model being compared (dAIC), and Akaike Weights (AICw), a measure of the conditional probabilities for each model (weights add up to 1).

| Diversification Rate Model | No. Rate Categories | lnL        | AIC       | dAIC    | AICw  |
|----------------------------|---------------------|------------|-----------|---------|-------|
| <b>Anura</b>               |                     |            |           |         |       |
| RmID ( $\mu=0$ )           | 2                   | -14598.181 | 29214.362 | 0.000   | 0.934 |
| RmDD ( $\mu=0$ )           | 2                   | -14586.825 | 29219.651 | 5.288   | 0.066 |
| RmDD ( $\mu=0$ )           | 1                   | -14797.023 | 29616.045 | 401.683 | 0.000 |
| CD ( $\mu=0$ )             | 1                   | -14804.711 | 29623.421 | 409.059 | 0.000 |
| <b>Caudata</b>             |                     |            |           |         |       |
| RmDD ( $\mu=0$ )           | 2                   | -2093.317  | 4236.634  | 0.000   | 1.000 |
| RmID ( $\mu=0$ )           | 2                   | -2125.950  | 4271.899  | 35.266  | 0.000 |
| RmDD ( $\mu=0$ )           | 1                   | -2148.263  | 4320.525  | 83.892  | 0.000 |
| CD ( $\mu=0$ )             | 1                   | -2198.240  | 4412.480  | 175.847 | 0.000 |
| <b>Gymnophiona</b>         |                     |            |           |         |       |
| CD ( $\mu=0$ )             | 1                   | -333.016   | 676.033   | 0.000   | 0.746 |
| RmDD ( $\mu=0$ )           | 1                   | -332.678   | 679.356   | 3.323   | 0.142 |
| RmID ( $\mu=0$ )           | 2                   | -332.909   | 679.818   | 3.785   | 0.112 |
| RmDD ( $\mu=0$ )           | 2                   | -330.784   | 691.568   | 15.535  | 0.000 |

**Supplementary Table 7.** Relationship of reproductive mode and life-cycle coding used in this manuscript compared to the categorization used by Duellman and Trueb<sup>1</sup>.

| <b>Coding</b>      | <b>Eggs</b>                                                                                                                                     | <b>Larvae</b>                                                                                                                       | <b>Bi-/Uni-phasic</b>         | <b>Duellman and Trueb Coding</b>      |
|--------------------|-------------------------------------------------------------------------------------------------------------------------------------------------|-------------------------------------------------------------------------------------------------------------------------------------|-------------------------------|---------------------------------------|
| Aquatic            | Aquatic                                                                                                                                         | Aquatic                                                                                                                             | Biphasic                      | 1,2,3,4,5,6                           |
| Semi-Terrestrial   | Terrestrial/Arboreal/Fossorial , Terrestrial or aquatic foam nests, internal, in specialized brooding structures such as pouches or vocal sacs. | Fully or semi aquatic (living in splash zones or films of water)                                                                    | Biphasic                      | 8,9,10,12,13,14,18,19, 21,23,24,25,26 |
| Terrestrial        | Terrestrial/Arboreal/Fossorial , Terrestrial or aquatic foam nests, internal, in specialized brooding structures such as pouches or vocal sacs. | Complete development in terrestrial nests (foam or otherwise), or in specialized brooding structures such as pouches or vocal sacs. | Biphasic                      | 15,16,22                              |
| Direct Development | Terrestrial or in specialized brooding pouches (e.g. Pipa pipa)                                                                                 | No free-living larva                                                                                                                | Uniphasic – direct developing | 11,17,20,27                           |
| Live-bearing       | No eggs, or eggs inside the womb of the female                                                                                                  | Live birth at late larval stage or post metamorphosis                                                                               | Uniphasic – direct developing | 28,29                                 |
| Paedomorphy        | Aquatic or Terrestrial (although the latter is extremely rare)                                                                                  | Aquatic, reproductive stage (obligatory)                                                                                            | Uniphasic – paedomorphic      | Not included                          |

## References

1. Duellman, W. E. & Trueb, L. *Biology of Amphibians*. (Johns Hopkins University Press, 1994).

**Supplementary Table 8:** Effect of root prior on corHMM models. Performance measured using Akaike Information Criterion (AIC), when implementing different transition rate restrictions (ER= equal rates; SYM=symmetric rates; ARD=all rates different) and root priors (MaddFitz and Yang), with or without hidden states (HMM=Hidden Markov Model).

| <i>Transition Rate Model</i> | <i>Root Prior</i> | <i>Hidden states</i> | <i>Log Likelihood</i> | <i>AIC</i> |
|------------------------------|-------------------|----------------------|-----------------------|------------|
| <i>ARD</i>                   | MaddFitz          | HMM                  | -830.636              | 1735.271   |
| <i>ARD</i>                   | Yang              | HMM                  | -835.386              | 1744.772   |
| <i>SYM</i>                   | MaddFitz          | HMM                  | -862.521              | 1787.042   |
| <i>SYM</i>                   | Yang              | HMM                  | -864.081              | 1790.161   |
| <i>SYM</i>                   | MaddFitz          |                      | -905.615              | 1841.230   |
| <i>ARD</i>                   | MaddFitz          |                      | -902.593              | 1841.187   |
| <i>SYM</i>                   | Yang              |                      | -907.049              | 1844.099   |
| <i>ARD</i>                   | Yang              |                      | -904.480              | 1844.960   |
| <i>ER</i>                    | MaddFitz          | HMM                  | -993.637              | 1993.274   |
| <i>ER</i>                    | Yang              | HMM                  | -995.137              | 1996.275   |
| <i>ER</i>                    | MaddFitz          |                      | -1027.774             | 2057.547   |
| <i>ER</i>                    | Yang              |                      | -1029.081             | 2060.163   |

**Supplementary Table 9:** Log Marginal Likelihood (log ML) estimates using the standard versus covarion BayesTraits Multistate algorithms with reverse jump MCMC and a stepping stone sampler, for Anura, Caudata and Gymnophiona.

|                    | <i>Standard MultiState (log ML)</i> | <i>Covarion MultiState (log ML)</i> | <i>Log BF</i> |
|--------------------|-------------------------------------|-------------------------------------|---------------|
| <i>Anura</i>       | -715.058                            | -714.497                            | 1.123         |
| <i>Caudata</i>     | -132.682                            | -123.782                            | 17.801        |
| <i>Gymnophiona</i> | -38.285                             | -36.318                             | 3.933         |

**Supplementary Table 10:** Posterior transition rate metrics for Anura, estimated using the covarian BayesTraits Multistate algorithms with reverse jump MCMC. Tabulated are the mean and median transition rates for each transition (where states are Aquatic [A], Semi-terrestrial [S], Terrestrial [T], Direct development [D] and Live-bearing [L]) as well as the percentage any given transition was not fixed to be zero in the posterior (i.e. how frequently is a given transition represented in the posterior) and the Effective Sample Size (ESS) + Highest probability Density interval (HPD) for the mean rate. Transitions are ranked by how frequently they were not zero.

| <i>transition</i> | <i>mean</i> | <i>median</i> | <i>% non-zero</i> | <i>ESS</i> | <i>HPD interval</i> |
|-------------------|-------------|---------------|-------------------|------------|---------------------|
| <i>qAD</i>        | 0.955       | 0.908         | 100.000           | 2000.000   | 0.622,1.387         |
| <i>qAS</i>        | 17.499      | 17.032        | 100.000           | 2000.000   | 8.756,26.956        |
| <i>qAT</i>        | 0.955       | 0.909         | 100.000           | 2000.000   | 0.622,1.387         |
| <i>qDS</i>        | 0.954       | 0.909         | 100.000           | 2000.000   | 0.622,1.387         |
| <i>qSA</i>        | 0.948       | 0.908         | 100.000           | 2000.000   | 0.615,1.368         |
| <i>qST</i>        | 0.948       | 0.908         | 100.000           | 2000.000   | 0.615,1.369         |
| <i>qAV</i>        | 0.937       | 0.905         | 99.250            | 2000.000   | 0.616,1.4           |
| <i>qVA</i>        | 0.937       | 0.905         | 99.250            | 2000.000   | 0.616,1.4           |
| <i>qTS</i>        | 0.900       | 0.897         | 94.800            | 2000.000   | 0,1.331             |
| <i>qSD</i>        | 0.760       | 0.848         | 85.200            | 2057.439   | 0,1.128             |
| <i>qTD</i>        | 0.510       | 0.706         | 54.300            | 2000.000   | 0,1.219             |
| <i>qTA</i>        | 0.461       | 0.000         | 48.750            | 2000.000   | 0,1.217             |
| <i>qTV</i>        | 0.347       | 0.000         | 37.550            | 2000.000   | 0,1.15              |
| <i>qVT</i>        | 0.347       | 0.000         | 37.550            | 2000.000   | 0,1.15              |
| <i>qDT</i>        | 0.042       | 0.000         | 5.250             | 1581.571   | 0,0.593             |
| <i>qDA</i>        | 0.034       | 0.000         | 4.100             | 2000.000   | 0,0                 |
| <i>qDV</i>        | 0.019       | 0.000         | 2.400             | 1254.320   | 0,0                 |
| <i>qVD</i>        | 0.019       | 0.000         | 2.400             | 1254.320   | 0,0                 |
| <i>qSV</i>        | 0.001       | 0.000         | 0.250             | 2000.000   | 0,0                 |
| <i>qVS</i>        | 0.001       | 0.000         | 0.250             | 2000.000   | 0,0                 |



**Supplementary Table 11:** Posterior transition rate metrics for Caudata, estimated using the covarion BayesTraits Multistate algorithms with reverse jump MCMC. Tabulated are the mean and median transition rates for each transition (where states are Aquatic [A], Semi-terrestrial [S], Direct development [D], Live-bearing [L], and Paedomorphism[P]), as well as the percentage any given transition was not fixed to be zero in the posterior (i.e. how frequently is a given transition represented in the posterior) and the Effective Sample Size (ESS) + Highest probability Density interval (HPD) for the mean rate. Transitions are ranked by how frequently they were not zero.

| <i>transition</i> | <i>mean</i> | <i>median</i> | <i>% non-zero</i> | <i>ESS</i> | <i>HPD interval</i> |
|-------------------|-------------|---------------|-------------------|------------|---------------------|
| <i>qAP</i>        | 6.862       | 6.367         | 100.000           | 2748.334   | 2.316,12.544        |
| <i>qAS</i>        | 6.772       | 6.306         | 99.750            | 2693.498   | 2.282,12.85         |
| <i>qDS</i>        | 5.281       | 5.273         | 89.825            | 2345.088   | 0,10.821            |
| <i>qSA</i>        | 6.416       | 6.003         | 88.950            | 2450.807   | 0,12.556            |
| <i>qDA</i>        | 4.748       | 5.005         | 80.125            | 2069.370   | 0,10.631            |
| <i>qSD</i>        | 4.900       | 5.153         | 72.950            | 2283.220   | 0,11.501            |
| <i>qSL</i>        | 3.841       | 3.959         | 64.650            | 1955.250   | 0,10.213            |
| <i>qLA</i>        | 2.800       | 0.000         | 45.375            | 3324.537   | 0,9.972             |
| <i>qPA</i>        | 2.318       | 0.000         | 44.675            | 3041.547   | 0,8.482             |
| <i>qLP</i>        | 2.521       | 0.000         | 43.200            | 3282.483   | 0,9.444             |
| <i>qLS</i>        | 2.584       | 0.000         | 43.200            | 2567.033   | 0,9.421             |
| <i>qLD</i>        | 2.215       | 0.000         | 37.850            | 3527.581   | 0,9.315             |
| <i>qDP</i>        | 1.908       | 0.000         | 36.075            | 2928.224   | 0,7.958             |
| <i>qSP</i>        | 1.728       | 0.000         | 35.225            | 3922.913   | 0,8.111             |
| <i>qPD</i>        | 1.581       | 0.000         | 35.050            | 2307.054   | 0,7.09              |
| <i>qPL</i>        | 1.590       | 0.000         | 33.450            | 1817.466   | 0,7.603             |
| <i>qDL</i>        | 1.333       | 0.000         | 25.050            | 2955.710   | 0,7.715             |
| <i>qPS</i>        | 0.752       | 0.000         | 19.625            | 3347.350   | 0,5.555             |
| <i>qAL</i>        | 0.424       | 0.000         | 18.900            | 2247.829   | 0,3.426             |
| <i>qAD</i>        | 0.270       | 0.000         | 12.525            | 3029.397   | 0,1.546             |

**Supplementary Table 12:** Posterior transition rate metrics for Gymnophiona, estimated using the covarion BayesTraits Multistate algorithms with reverse jump MCMC. Tabulated are the mean and median transition rates for each transition (where states are Semi-terrestrial [S], Direct development [D] and Live-bearing [L]) as well as the percentage any given transition was not fixed to be zero in the posterior (i.e. how frequently is a given transition represented in the posterior) and the Effective Sample Size (ESS) + Highest probability Density interval (HPD) for the mean rate. Transitions are ranked by how frequently they were not zero.

| <i>transition</i> | <i>mean</i> | <i>median</i> | <i>% non-zero</i> | <i>ESS</i> | <i>HPD interval</i> |
|-------------------|-------------|---------------|-------------------|------------|---------------------|
| <i>qSD</i>        | 7.570       | 5.528         | 95.280            | 13508.221  | 0,18.653            |
| <i>qDV</i>        | 2.886       | 2.376         | 57.970            | 14402.577  | 0,7.887             |
| <i>qDS</i>        | 2.920       | 2.357         | 57.815            | 14860.482  | 0,8.093             |
| <i>qSV</i>        | 4.717       | 0.000         | 44.585            | 12816.359  | 0,17.582            |
| <i>qVD</i>        | 2.989       | 0.000         | 41.820            | 17395.737  | 0,12.002            |
| <i>qVS</i>        | 2.396       | 0.000         | 27.225            | 17852.140  | 0,12.107            |

## Supplementary Notes 1: Root state estimations for Amphibia, using corHMM

Our hypothesis testing approach for reproductive mode evolution assumes that extant amphibians have evolved from fully aquatic ancestors. Various lines of evidence support this assumption (e.g. Hanken<sup>1</sup>; Schoch et al.<sup>2</sup>). To confirm nonetheless that our large phylogenetic dataset continues to recover aquatic biphasic reproduction as the ancestral condition, we estimated ancestral states for the entire amphibian tree (4025 species) using a Markov model implemented with corHMM<sup>3</sup> with and without "hidden" states, and two different root prior methods: MaddFitz<sup>4,5</sup> and Yang<sup>6</sup>. Ancestral states were estimated using marginal probabilities. All other settings are identical to those described in the main text.

As described in the methods of the main text (and shown in other studies, e.g. Davis et al.<sup>7</sup>) rare states (i.e. high tip state ratio bias) result in problematic parameter estimations. Specifically, we have found that in models with hidden states (where rare states become even rarer), transition rate estimates away from rare states were multiple order of magnitudes larger than any other rates. Three of our six reproductive-mode categories are rare. For the whole amphibian tree, the terrestrial mode is represented by 2.06%, paedomorphism by 0.86% and live bearing by 0.73% of species (compared to aquatic = 45.45%, semi-terrestrial = 23.47% and direct development = 27.42%). Transitions to and away from these three rare states were therefore fixed to be symmetric for all twelve models, which we have found results in more credible transition rate estimates.

As expected, the most recent common ancestor for all amphibians, as well as for anurans and for caudates were estimated to have had an aquatic life history mode (Supplementary Figure 7, below). For Gymnophiona, we recovered a semi-terrestrial ancestor as the most likely scenario for Gymnophiona, in concordance with previous studies<sup>8</sup>. The best performing model was a model with no (other than the above mentioned) state transition restrictions (i.e. the ARD model), hidden states and a MaddFitz root prior (Supplementary Table 8, below) but the state estimations at the ancestral nodes were not sensitive to any of the tested model variations (Supplementary Figure 7).

## References

1. Hanken, J. in *The Origin and Evolution of Larval Forms* 61–108 (Gulf Professional Publishing, 1999).
2. Schoch, R. Evolution of life cycles in early amphibians. *Annu. Rev. Earth Planet. Sci.* **37**, 135–162 (2009).
3. Beaulieu, J. M., Oliver, J. C., O'Meara, B. & Boyko, J. R package 'corHMM': hidden markov models of character evolution. (2020).
4. Maddison, W., Midford, P. & Otto, S. Estimating a binary character's effect on speciation and extinction. *Syst. Biol.* **56**, 701–710 (2007).
5. FitzJohn, R. G., Maddison, W. P. & Otto, S. P. Estimating trait-dependent speciation and extinction rates from incompletely resolved phylogenies. *Syst. Biol.* **58**, 595–611 (2009).
6. Yang, Z. *Computational Molecular Evolution*. (Oxford University Press, 2006). doi:10.1093/acprof:oso/9780198567028.001.0001
7. Davis, M. P., Midford, P. E. & Maddison, W. Exploring power and parameter estimation of the BiSSE method for analyzing species diversification. *BMC Evol. Biol.* **13**, 38 (2013).
8. San Mauro, D. *et al.* Life-history evolution and mitogenomic phylogeny of caecilian amphibians. *Mol. Phylogenet. Evol.* **73**, 177–189 (2014).
