# Supplementary material for: The evolution of reproductive modes and life cycles in amphibians
Source: PubMed Central journal article supplement (PMC9672123; doi:10.1038/s41467-022-34474-4), 2022-11-17
Supplement: 41467_2022_34474_MOESM2_ESM.pdf [file 41467_2022_34474_MOESM2_ESM.pdf]

### **Description of Additional Supplementary Files**

File Name: Supplementary Data 1

Description: Reproductive mode coding of amphibian species in this study.

File Name: Supplementary Data 2

Description: Rate estimates from best performing SSE models (both hisse and secsse)

File Name: Supplementary Data 3

Description: Taxonomic changes made to the phylogeny

File Name: Supplementary Data 4

Description: Phylogeny used for comparative analyses in this study.
